# Supplementary figures and images for: Synergistic effects of ion exchange and complexation processes in cysteine-modified clinoptilolite nanoparticles for removal of Cu(ii) from aqueous solutions in batch and continuous flow systems
Source: Royal Society of Chemistry journal article supplement (doi:10.1039/c7nj00075h), 2017-01-01

**Graphical Abstract:**

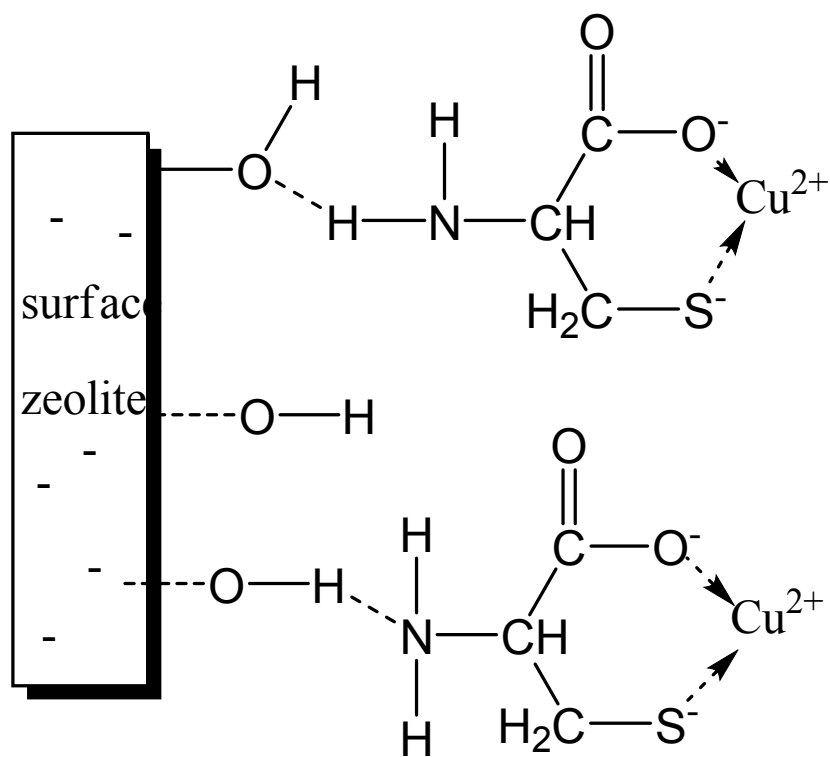

Supplement: c7nj00075h1.pdf [file c7nj00075h1.pdf]
